# Supplementary material
Source: MDPI journal article supplement (https://www.mdpi.com/2311-5637/8/10/487)
Supplement: s1 [file s1]

# Fermented Brewers' Spent Grain Containing Dextran and Oligosaccharides as Ingredient for Composite Wheat Bread and Its Impact on Gut Metabolome In Vitro

Prabin Koirala <sup>1,\*</sup>, Alice Costantini <sup>2</sup>, Henry N. Maina <sup>1</sup>, Carlo Giuseppe Rizzello <sup>3</sup>, Michela Verni <sup>4</sup>,  
Valentina De Beni <sup>1</sup>, Andrea Polo <sup>2</sup>, Kati Katina <sup>1</sup>, Raffaella Di Cagno <sup>2</sup> and Rossana Coda <sup>1,5</sup>

<sup>1</sup> Department of Food and Nutrition, University of Helsinki, P.O. Box 66 (Agnes Sjöbergin Katu 2), 00014 Helsinki, Finland

<sup>2</sup> Faculty of Science and Technology, Libera Università di Bolzano, 39100 Bolzano, Italy;

<sup>3</sup> Department of Environmental Biology, "Sapienza" University of Rome, 00185 Rome, Italy;

<sup>4</sup> Department of Soil, Plant and Food Science, University of Bari "Aldo Moro", 70126 Bari, Italy;

<sup>5</sup> Faculty of Agriculture and Forestry, Helsinki Institute of Sustainability Science (HELSUS), University of Helsinki, 00014 Helsinki, Finland

\* Correspondence: prabin.koirala@helsinki.fi; Tel.: +358-456463266

**Supplementary Table S1. Technological parameters and texture analysis of BSG breads. WB: control wheat bread; BB: native BSG bread; EPS-BB: EPS- fermented BSG breads; EPS+BB: EPS+ fermented BSG breads.** Baking loss was calculated as the decrease of weight between dough and loaf ( $\%bake\ loss = ((dough\ weight - bread\ weight) \div dough\ weight) \times 100$ ). Staling rate was calculated as hardness difference in 4 days of storage ( $Staling\ rate = (hardness\ in\ day\ 4 - hardness\ in\ day\ 1) \div days\ of\ storage$ ).

| Parameters                    | Types of bread            |                            |                            |                           |
|-------------------------------|---------------------------|----------------------------|----------------------------|---------------------------|
|                               | WB                        | BB                         | EPS-BB                     | EPS+BB                    |
| <b>Baking loss (%)</b>        | 13.7 ± 0.5 <sup>a</sup>   | 10.4 ± 0.6 <sup>b</sup>    | 10.3 ± 0.6 <sup>b</sup>    | 11.1 ± 0.6 <sup>b</sup>   |
| <b>Specific volume (ml/g)</b> | 5.1 ± 0.1 <sup>a</sup>    | 3.0 ± 0.0 <sup>c</sup>     | 2.9 ± 0.0 <sup>d</sup>     | 3.4 ± 0.1 <sup>b</sup>    |
| <b>Hardness (g/day 1)</b>     | 149.5 ± 17.3 <sup>a</sup> | 455.3 ± 94.9 <sup>c</sup>  | 592.3 ± 87.5 <sup>d</sup>  | 281.8 ± 31.1 <sup>b</sup> |
| <b>Hardness (g/day 4)</b>     | 286.6 ± 43.1 <sup>a</sup> | 778.9 ± 116.2 <sup>c</sup> | 951.4 ± 127.0 <sup>d</sup> | 497.3 ± 59.9 <sup>b</sup> |
| <b>Staling rate (g/d)</b>     | 34.3 <sup>a</sup>         | 80.9 <sup>c</sup>          | 89.8 <sup>d</sup>          | 53.9 <sup>b</sup>         |
| <b>Springiness (day 1)</b>    | 0.97 ± 0.02 <sup>a</sup>  | 0.93 ± 0.01 <sup>b</sup>   | 0.92 ± 0.02 <sup>b</sup>   | 0.90 ± 0.02 <sup>c</sup>  |
| <b>Cohesiveness (day 1)</b>   | 0.73 ± 0.02 <sup>a</sup>  | 0.67 ± 0.02 <sup>b</sup>   | 0.65 ± 0.01 <sup>c</sup>   | 0.65 ± 0.01 <sup>c</sup>  |
| <b>Chewiness (day 1)</b>      | 105.9 ± 10.7 <sup>a</sup> | 284.1 ± 53.7 <sup>c</sup>  | 350.4 ± 45.8 <sup>d</sup>  | 163.8 ± 15.8 <sup>b</sup> |
| <b>Resilience (day 1)</b>     | 0.38 ± 0.02 <sup>a</sup>  | 0.33 ± 0.01 <sup>b</sup>   | 0.31 ± 0.01 <sup>c</sup>   | 0.30 ± 0.01 <sup>d</sup>  |

\*a–d Values with different letters in same row are significantly different (Tukey's test. P<0.05)

**According to EU regulation ((EC) No 1924/2006), these enriched breads can be considered as source of fibre (up to 3.9 g per 100 g bread) and protein.**

**Supplementary Table S2. Gut microbiota composition of selected donor at genus level.**

| Kingdom         | Phylum           | Class          | Order              | Family                    | Genus                            | Relative abundance |
|-----------------|------------------|----------------|--------------------|---------------------------|----------------------------------|--------------------|
| <b>Bacteria</b> | Firmicutes       | Clostridia     | Oscillospirales    | Ruminococcaceae           | Faecalibacterium                 | 0,209257934        |
| <b>Bacteria</b> | Firmicutes       | Clostridia     | Lachnospirales     | Lachnospiraceae           | Blautia                          | 0,170365068        |
| <b>Bacteria</b> | Firmicutes       | Clostridia     | Lachnospirales     | Lachnospiraceae           | Anaerostipes                     | 0,128370317        |
| <b>Bacteria</b> | Bacteroidota     | Bacteroidia    | Bacteroidales      | Bacteroidaceae            | Bacteroides                      | 0,11095204         |
| <b>Bacteria</b> | Firmicutes       | Clostridia     | Lachnospirales     | Lachnospiraceae           | Fusicatenibacter                 | 0,066332618        |
| <b>Bacteria</b> | Firmicutes       | Clostridia     | Lachnospirales     | Lachnospiraceae           | [Ruminococcus] gauvreauii group  | 0,042949177        |
| <b>Bacteria</b> | Firmicutes       | Clostridia     | Lachnospirales     | Lachnospiraceae           | NA*                              | 0,031257456        |
| <b>Bacteria</b> | Firmicutes       | Clostridia     | Lachnospirales     | Lachnospiraceae           | Dorea                            | 0,030541637        |
| <b>Bacteria</b> | Firmicutes       | Clostridia     | Lachnospirales     | Lachnospiraceae           | [Eubacterium] hallii group       | 0,020042949        |
| <b>Bacteria</b> | Firmicutes       | Clostridia     | Lachnospirales     | Lachnospiraceae           | Roseburia                        | 0,018372703        |
| <b>Bacteria</b> | Firmicutes       | Clostridia     | Lachnospirales     | Lachnospiraceae           | Lachnospiraceae NK4A136 group    | 0,014077786        |
| <b>Bacteria</b> | Firmicutes       | Clostridia     | Clostridiales      | Clostridiaceae            | Clostridium sensu stricto 1      | 0,011930327        |
| <b>Bacteria</b> | Firmicutes       | Clostridia     | NA*                | NA*                       | NA*                              | 0,010737294        |
| <b>Bacteria</b> | Firmicutes       | Clostridia     | Lachnospirales     | Lachnospiraceae           | Lachnospiraceae UCG-003          | 0,010260081        |
| <b>Bacteria</b> | Firmicutes       | Clostridia     | Oscillospirales    | Ruminococcaceae           | Subdoligranulum                  | 0,010021475        |
| <b>Bacteria</b> | Firmicutes       | Bacilli        | Erysipelotrichales | Erysipelatoclostridiaceae | Erysipelotrichaceae UCG-003      | 0,009305655        |
| <b>Bacteria</b> | Firmicutes       | Clostridia     | Lachnospirales     | Lachnospiraceae           | [Eubacterium] eligens group      | 0,009305655        |
| <b>Bacteria</b> | Firmicutes       | Clostridia     | Clostridia UCG-014 | NA*                       | NA*                              | 0,007874016        |
| <b>Bacteria</b> | Firmicutes       | Clostridia     | Lachnospirales     | Lachnospiraceae           | [Ruminococcus] torques group     | 0,007874016        |
| <b>Bacteria</b> | Firmicutes       | Bacilli        | Erysipelotrichales | Erysipelotrichaceae       | Holdemanella                     | 0,007635409        |
| <b>Bacteria</b> | Bacteroidota     | Bacteroidia    | Bacteroidales      | Prevotellaceae            | Paraprevotella                   | 0,007158196        |
| <b>Bacteria</b> | Bacteroidota     | Bacteroidia    | Bacteroidales      | Barnesiellaceae           | Barnesiella                      | 0,00691959         |
| <b>Bacteria</b> | Firmicutes       | Clostridia     | Lachnospirales     | Lachnospiraceae           | CAG-56                           | 0,00691959         |
| <b>Bacteria</b> | Firmicutes       | Clostridia     | Monoglobales       | Monoglobaceae             | Monoglobus                       | 0,005726557        |
| <b>Bacteria</b> | Actinobacteriota | Coriobacteriia | Coriobacteriales   | Coriobacteriaceae         | Collinsella                      | 0,00548795         |
| <b>Bacteria</b> | Firmicutes       | Clostridia     | Oscillospirales    | Oscillospiraceae          | UCG-002                          | 0,00548795         |
| <b>Bacteria</b> | Bacteroidota     | Bacteroidia    | Bacteroidales      | Rikenellaceae             | Alistipes                        | 0,004533524        |
| <b>Bacteria</b> | Firmicutes       | Clostridia     | Lachnospirales     | Lachnospiraceae           | [Eubacterium] xylanophilum group | 0,004056311        |
| <b>Bacteria</b> | Firmicutes       | Bacilli        | Lactobacillales    | Streptococcaceae          | Streptococcus                    | 0,003340492        |

**Table S2: *Cont.***

| Kingdom  | Phylum           | Class               | Order                               | Family                                | Genus                           | Relative abundance |
|----------|------------------|---------------------|-------------------------------------|---------------------------------------|---------------------------------|--------------------|
| Bacteria | Firmicutes       | Negativicutes       | Veillonellales-Selenomonadales      | Veillonellaceae                       | NA <sup>*</sup>                 | 0,003340492        |
| Bacteria | Firmicutes       | Negativicutes       | Veillonellales-Selenomonadales      | Veillonellaceae                       | Dialister                       | 0,003101885        |
| Bacteria | Firmicutes       | Clostridia          | Oscillospirales                     | [Eubacterium] coprostanoligenes group | NA <sup>*</sup> NA <sup>*</sup> | 0,002624672        |
| Bacteria | Bacteroidota     | Bacteroidia         | Bacteroidales                       | Tannerellaceae                        | Parabacteroides                 | 0,001908852        |
| Bacteria | Firmicutes       | Clostridia          | Lachnospirales                      | Lachnospiraceae                       | Lachnospira                     | 0,001908852        |
| Bacteria | Actinobacteriota | Coriobacteriia      | Coriobacteriales                    | Coriobacteriales Incertae Sedis       | NA <sup>*</sup>                 | 0,001670246        |
| Bacteria | Firmicutes       | Clostridia          | Oscillospirales                     | Ruminococcaceae                       | Ruminococcus                    | 0,001431639        |
| Bacteria | Firmicutes       | Clostridia          | Peptostreptococcales-Tissierellales | Peptostreptococcaceae                 | Romboutsia                      | 0,001431639        |
| Bacteria | Actinobacteriota | Coriobacteriia      | Coriobacteriales                    | Eggerthellaceae                       | Senegalimassilia                | 0,001193033        |
| Bacteria | Proteobacteria   | Gammaproteobacteria | Burkholderiales                     | NA <sup>*</sup>                       | NA <sup>*</sup>                 | 0,000954426        |
| Bacteria | Firmicutes       | Clostridia          | Lachnospirales                      | Lachnospiraceae                       | Lachnospiraceae UCG-004         | 0,000954426        |
| Bacteria | Bacteroidota     | Bacteroidia         | Bacteroidales                       | NA <sup>*</sup>                       | NA <sup>*</sup>                 | 0,00071582         |
| Bacteria | Proteobacteria   | Gammaproteobacteria | Burkholderiales                     | Sutterellaceae                        | Sutterella                      | 0,00071582         |
| Bacteria | Firmicutes       | Bacilli             | Lactobacillales                     | Lactobacillaceae                      | Ligilactobacillus               | 0,000477213        |
| Bacteria | NA <sup>*</sup>  | NA <sup>*</sup>     | NA <sup>*</sup>                     | NA <sup>*</sup>                       | NA <sup>*</sup>                 | 0,000477213        |

<sup>\*</sup>NA means not applicable

**Supplementary Table S3. Pearson correlation among bread EPS+BB composition and SHIME metabolites in luminal samples after one week of treatment.** Values are different from 0 with a significance level  $\alpha = 0.05$ . \* < 0.01.

| Proximal Colon (PC) |                  |                     | Distal Colon (DC)  |                     |                     |
|---------------------|------------------|---------------------|--------------------|---------------------|---------------------|
| SHIME® Metabolites  | EPS+BB variables | Pearson correlation | SHIME® Metabolites | EPS+BB variables    | Pearson correlation |
| <b>GABA</b>         | Fructose         | <b>0.9999804*</b>   | <b>Asp</b>         | Oligo, DP6-DP7      | 0.99986908          |
| <b>Pro</b>          | Fructose         | -0.998426           | <b>Thr</b>         | Oligo, DP3-DP4      | -0.9970823          |
| <b>GABA</b>         | Dextran          | -0.998111           | <b>Thr</b>         | Oligo, DP5          | -0.9971446          |
| <b>Thr</b>          | Oligo, DP3-DP4   | -0.997082           | <b>Ser</b>         | Oligo, DP6-DP7      | 0.99927674          |
| <b>Thr</b>          | Oligo, DP5       | -0.997145           | <b>Ala</b>         | Oligo, DP6-DP7      | 0.99979295          |
| <b>Butyric acid</b> | Oligo, DP5       | 0.9979189           | <b>Val</b>         | Oligo, DP6-DP7      | 0.99960577          |
| <b>GABA</b>         | Fiber            | <b>0.9999264*</b>   | <b>Cys</b>         | Oligo, DP6-DP7      | 0.99827202          |
| <b>Pro</b>          | Fiber            | -0.999289           | <b>Phe</b>         | Oligo, DP6-DP7      | <b>0.99996378*</b>  |
| <b>Lys</b>          | Fat              | <b>0.9999993*</b>   | <b>GABA</b>        | Glucose             | -0.9993081          |
| <b>Cys</b>          | Fat              | <b>0.9999502*</b>   | <b>Amm</b>         | Fructose            | 0.99985969          |
| <b>Arg</b>          | Fat              | 0.9998715           | <b>Amm</b>         | Dextran             | -0.9992606          |
| <b>Met</b>          | Fat              | 0.9998629           | <b>Amm</b>         | Fiber               | 0.99938254          |
| <b>Orn</b>          | Fat              | 0.9996952           | <b>Lys</b>         | Oligo, DP6-DP7      | 0.99770572          |
| <b>Ser</b>          | Fat              | 0.9995196           | <b>Arg</b>         | Oligo, DP6-DP7      | 0.99859048          |
| <b>Ala</b>          | Fat              | 0.9988279           | <b>Total AA</b>    | Total carbohydrates | 0.99912942          |
| <b>Ile</b>          | Fat              | 0.9987423           | <b>Total AA</b>    | Maltose             | 0.99871669          |
| <b>Phe</b>          | Fat              | 0.9981856           | <b>Total AA</b>    | Dextran             | -0.9987998          |
| <b>Trp</b>          | Acetic acid      | 0.9979543           | <b>Asp</b>         | TTA                 | -0.9983843          |
| <b>Asp</b>          | pH               | -0.998382           | <b>Glu</b>         | TTA                 | 0.99917676          |
| <b>Glu</b>          | pH               | 0.9991769           | <b>Val</b>         | TTA                 | -0.9989898          |
| <b>Val</b>          | pH               | -0.998991           |                    |                     |                     |

**Supplementary Table S4. Pearson correlation among bread EPS-BB composition and SHIME metabolites in luminal samples after one week of treatment.** Values are different from 0 with a significance level  $\alpha = 0.05$ . \*  $< 0.01$ .

| Proximal Colon (PC) |                  |                     | Distal Colon (DC)     |                  |                     |
|---------------------|------------------|---------------------|-----------------------|------------------|---------------------|
| SHIME® Metabolites  | EPS-BB variables | Pearson correlation | SHIME® Metabolites    | EPS-BB variables | Pearson correlation |
| <b>His</b>          | Fructose         | 0.993429905         | <b>Leu</b>            | Maltose          | 0.99983734          |
| <b>His</b>          | Sucrose          | 0.997803687         | <b>Tyr</b>            | Fructose         | 0.99849293          |
| <b>His</b>          | Maltose          | 0.999165168         | <b>Leu</b>            | Fructose         | 0.99757812          |
| <b>Tyr</b>          | Lactic Acid      | -0.99745827         | <b>Tyr</b>            | Protein          | 0.99977263          |
| <b>Leu</b>          | Lactic Acid      | <b>-0.99999896*</b> | <b>Trp</b>            | Fat              | -0.9980155          |
| <b>Thr</b>          | pH               | <b>1*</b>           | <b>Leu</b>            | Protein          | 0.99866799          |
|                     |                  |                     | <b>Propionic acid</b> | Lactic Acid      | -0.99712572         |
|                     |                  |                     | <b>His</b>            | Lactic Acid      | -0.998811792        |
|                     |                  |                     | <b>Trp</b>            | Acetic acid      | -0.998851736        |
